# Supplementary material for: 1-Alkenyl-3-methylimidazolium trifluoromethanesulfonate ionic liquids: novel and low-viscosity ionic liquid electrolytes for dye-sensitized solar cells
Source: PubMed Central journal article supplement (PMC9079676; doi:10.1039/c7ra12904a), 2018-04-09
Supplement: RA-008-C7RA12904A-s001.pdf [file RA-008-C7RA12904A-s001.pdf]

## Supporting information

For

### **1-Alkenyl-3-methylimidazolium trifluoromethanesulfonate ionic liquids: novel and low-viscosity ionic liquid electrolytes for dye-sensitized solar cells.**

Phuong Tuyet Nguyen<sup>a\*</sup>, Trang Ngoc Nguyen<sup>a</sup>, Vinh Son Nguyen<sup>a</sup>, Hai Truong Nguyen<sup>b</sup>, Dung Kim Thi Ngo<sup>b</sup> and Phuong Hoang Tran<sup>b\*</sup>

<sup>a</sup>Department of Applied Inorganic Chemistry, Faculty of Chemistry, University of Sciences, Viet Nam National University, Ho Chi Minh City 70000, Viet Nam.

<sup>b</sup>Department of Organic Chemistry, Faculty of Chemistry, University of Sciences, Viet Nam National University, Ho Chi Minh City 70000, Viet Nam.

Corresponding author: [ntphuong@hcmus.edu.vn](mailto:ntphuong@hcmus.edu.vn) (Phuong Tuyet Nguyen), [thphuong@hcmus.edu.vn](mailto:thphuong@hcmus.edu.vn) (Phuong Hoang Tran)

## Table of contents

|                                                                                                                                                |               |
|------------------------------------------------------------------------------------------------------------------------------------------------|---------------|
| <b>Section S1.</b> Syntheses of materials                                                                                                      | <b>S1</b>     |
| <b>Section S2.</b> The comparison for photovoltaic performance of DSCs applied different types of electrolyte solutions based on ionic liquids | <b>S2-S3</b>  |
| <b>Section S3.</b> Spectral data                                                                                                               | <b>S3-S16</b> |
| <b>Section S4.</b> References                                                                                                                  | <b>S17</b>    |

## Section S1. Syntheses of Materials

### Chemicals and supplies.

1-Methylimidazole (*ReagentPlus*<sup>®</sup>, 99%), Allyl bromide (reagent grade, 97%), 4-bromo-1-butene (assay, 97%), 5-bromo-1-pentene (assay, 95%), lithium trifluoromethanesulfonate (assay, 96%), iodomethane (grade analytical standard), iodoethane (assay, 99%), 1-iodopropane (assay, 99%) were obtained from Sigma-Aldrich. Celite was obtained from Merck. Acetonitrile (purity  $\geq 99.5\%$ ), diethyl ether ( $\geq 95\%$ ), chloroform (purity  $\geq 99\%$ ) were obtained from Xilong Chemical Co., Ltd (China). Chloroform-*d*, 99.8 Atom %D, stab. with Ag was obtained from Armar (Switzerland).

All starting materials, reagent and solvents were used without further purification.

### Analytical techniques.

The <sup>1</sup>H and <sup>13</sup>C NMR spectra were recorded on a Bruker Advance 500 instruments using CDCl<sub>3</sub> as solvent and solvent peaks or TMS as internal standards. Thermal gravimetric analysis (TGA) was measured on a TA Q500 thermal analysis system with the sample held in a platinum pan in a continuous airflow. Viscosity of ionic liquids was performed using Brookfield DV-III programmable Rheometer (at room temperature ~30 °C). The ionic conductivity of ILs was measured by using Conductimeter OAKION CON 2700. HRMS (ESI) data were recorded on Bruker micrOTOF-QII MS at 80 eV.

**Section S2.** The comparison for photovoltaic performance of DSCs applied different types of electrolyte solutions based on ionic liquids

**Table S1.** Photovoltaic performance of DSCs applied different types of electrolyte solutions based on ionic liquids.

| Entry | Composition of IL electrolyte                                                                                                          | J <sub>sc</sub><br>(mA/cm <sup>2</sup> ) | V <sub>oc</sub><br>(V) | Fill<br>factor | Efficiency<br>(%) | Light<br>Intensity<br>(mW/cm <sup>2</sup> ) | Dye     |
|-------|----------------------------------------------------------------------------------------------------------------------------------------|------------------------------------------|------------------------|----------------|-------------------|---------------------------------------------|---------|
| 1     | 10% HMImI, 90% EMImTf <sub>2</sub> N, 5 mM I <sub>2</sub> <sup>1</sup>                                                                 | 11.8                                     | 0.57                   | 0.72           | -                 | 100                                         | N-3     |
|       | 10% HMImI, 90% EMImTfO, 5mM I <sub>2</sub> <sup>1</sup>                                                                                | 9.5                                      | 0.23                   | 0.69           | -                 | 100                                         | N-3     |
| 2     | 0.9M DMHImI, 30 mM I <sub>2</sub> in EMImTFSI <sup>2</sup>                                                                             | 0.9                                      | 0.50                   | 0.80           | 0.36              | 100                                         | N-3     |
|       | 0.9M DMHImI, 30 mM I <sub>2</sub> in EMImF·2.3HF <sup>2</sup>                                                                          | 5.8                                      | 0.65                   | 0.56           | 2.1               | 100                                         | N-3     |
| 3     | 0.1M I <sub>2</sub> , 0.45M NMBI in PMII and EMIDCN (13:7 v/v) <sup>3</sup>                                                            | 10.4                                     | 0.74                   | 0.74           | 5.7               | 100                                         | Z-907   |
|       | 0.1M I <sub>2</sub> , 0.1M LiI, 0.45M NMBI in PMII and EMIDCN (13:7 v/v) <sup>3</sup>                                                  | 12.8                                     | 0.71                   | 0.73           | 6.6               | 100                                         | Z-907   |
|       | 0.1M I <sub>2</sub> , 0.1M LiI, 0.45M NMBI in PMII and EMIDCN (13:7 v/v) <sup>3</sup>                                                  | -                                        | 0.68                   | -              | 5.0               | 100                                         | N-719   |
| 4     | 0.2M I <sub>2</sub> , 0.14M GuSCN, 0.5M TBP in PMII and EMINCS (13:7 v/v) <sup>4</sup>                                                 | 11.4                                     | 0.74                   | 0.76           | 6.4               | 100                                         | Z-907   |
| 5     | [I <sup>-</sup> :I <sub>2</sub> =10:1], [I <sup>+</sup> +I <sub>3</sub> <sup>-</sup> ]=2M, 1M TBP, 0.5M LiI in EMImDCA <sup>5</sup>    | 11.8                                     | 0.73                   | 0.63           | 5.5               | 100                                         | N-3     |
|       | [I <sup>-</sup> :I <sub>2</sub> =10:1], [I <sup>+</sup> +I <sub>3</sub> <sup>-</sup> ]=1.5M, 1M TBP, 0.1M LiI in EMImTFSI <sup>5</sup> | 12                                       | 0.63                   | 0.59           | 4.5               | 100                                         | N-3     |
| 6     | I <sub>2</sub> , 0.5M NMBI in PMII and EMImTCM (1:1 v/v) <sup>6</sup>                                                                  | 12.81                                    | 0.75                   | 0.76           | 7.4               | 100                                         | Z-907Na |
| 7     | 0.2M I <sub>2</sub> , 0.5M NMBI, 0.1M GuSCN in PMII and EMIB(CN) <sub>4</sub> (13:7 v/v) <sup>7</sup>                                  | 12.7                                     | 0.72                   | 0.70           | 6.4               | 100                                         | Z-907Na |
| 8     | 0.2M I <sub>2</sub> , 0.1M GuSCN, 0.5M NMBI in PMII and EMIB(CN) <sub>4</sub> (65:35 v/v) <sup>8</sup>                                 | 14.56                                    | 0.71                   | 0.70           | 7.2               | 100                                         | K-77    |
| 9     | 0.8M PMII, 0.1M PMIIBr <sub>2</sub> , 0.1M GuSCN, 0.5M NBMI in $\gamma$ -butyrolactone <sup>9</sup>                                    | 1.3                                      | 0.75                   | 0.73           | 7.3               | 100                                         | N-3     |
| 10    | 0.6M MVII, 0.06M I <sub>2</sub> , 0.6M LiI, 0.5M TBP in propylene carbonate <sup>10</sup>                                              | 12.19                                    | 0.67                   | 0.61           | 4.98              | 100                                         | N-3     |
| 11    | (Bu <sub>2</sub> MeS)I:I <sub>2</sub> =100:1 <sup>11</sup>                                                                             | 0.80                                     | 0.55                   | 0.52           | 2.3               | 100                                         | N-719   |
| 12    | 0.15M I <sub>2</sub> , 0.5M TBP, 0.1M GuSCN, PMII and EMIMBF <sub>4</sub> (1:1 v/v) <sup>12</sup>                                      | 13.67                                    | 0.63                   | 0.58           | 4.99              | 100                                         | N-3     |
| 13    | 0.3M I <sub>2</sub> , 1.5M PMII, 0.1M LiI, 0.5M TBP in S <sub>53</sub> TFSI <sup>13</sup>                                              | 8.28                                     | 0.64                   | 0.60           | 3.27              | 100                                         | N-719   |
| 14    | 0.03M I <sub>2</sub> , 0.1M GuSCN, 0.5M TBP, 0.6M FIL in acetonitrile and valeronitrile (85:15 v/v) <sup>14</sup>                      | 11.50                                    | 0.61                   | 0.73           | 5.1               | 30                                          | Z-907   |

|    |                                                                                                     |       |      |      |      |     |       |
|----|-----------------------------------------------------------------------------------------------------|-------|------|------|------|-----|-------|
| 15 | T <sub>2</sub> :EMITCM:PMIT=2:5.6:10,<br>T <sub>2</sub> =0.64M <sup>15</sup>                        | 10.71 | 0.66 | 0.47 | 3.30 | 100 | N-719 |
| 16 | 2M I <sub>2</sub> , 2M LiI, PMII and BMISCN<br>(1:0.75 v/v) <sup>16</sup>                           | 6.52  | 0.62 | 0.47 | 1.89 | 100 | N-719 |
| 17 | 0.05M I <sub>2</sub> , 0.1M LiI, 0.6M butyl<br>substituted imidazolium iodine<br>salt <sup>17</sup> | 17.60 | 0.60 | 0.49 | 5.17 | 100 | N-719 |
| 18 | Our work: 0.05 M I <sub>2</sub> , 0.1 M PMII, 0.6<br>M GuNCS, 0.5 M NBB, and<br>[ButMIm]OTf         | 11.41 | 0.66 | 0.65 | 4.91 | 100 | N719  |

## Section S3. Spectral data

### 1-Allyl-3-methylimidazolium tetrafluoromethanesulfonate [AMIm](OTf)

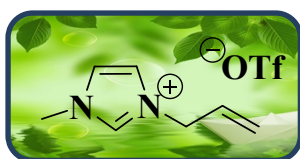

<sup>1</sup>H NMR (500 MHz, CDCl<sub>3</sub>)  $\delta$  9.62 (s, 1H), 7.42 (s, 1H), 7.33 (s, 1H), 6.01–5.95 (q,  $J$  = 10.5 Hz, 17.0 Hz, 1H), 5.46–5.42 (t,  $J$  = 8.5 Hz, 2H), 4.88–4.87 (d,  $J$  = 6.5 Hz, 2H), 4.00 (s, 3H).

<sup>13</sup>C NMR (125 MHz, CDCl<sub>3</sub>)  $\delta$  135.9, 127.8, 121.6, 121.0, 119.8, 114.5, 50.3, 34.9.

HRMS (ESI)  $m/z$  Calcd for [M]<sup>+</sup>123.0927; Found 123.0971.

Viscosity ( $\eta$ ) (~30 °C): 33.7 cP.

Conductivity ( $\sigma_c$ ) (~30 °C): 0.780 (mS.cm<sup>-1</sup>).

### 1-Butenyl-3-methylimidazolium tetrafluoromethanesulfonate [ButMIm](OTf)

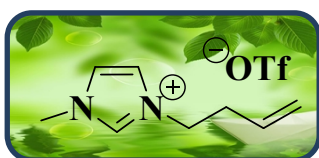

<sup>1</sup>H NMR (500 MHz, CDCl<sub>3</sub>)  $\delta$  9.82 (s, 1H), 7.31 (s, 2H), 5.81 – 5.73 (m, 1H), 5.13 – 5.07 (t,  $J$  = 10.0 Hz, 2H), 4.38 – 4.35 (t,  $J$  = 7.0 Hz, 2H), 4.02 (s, 3H), 3.85 (s, 1H), 3.73 (s, 1H).

<sup>13</sup>C NMR (125 MHz, CDCl<sub>3</sub>)  $\delta$  137.2, 132.2, 123.4, 122.2, 119.6, 116.4, 49.2, 36.5, 34.2.

HRMS (ESI)  $m/z$  Calcd for [M]<sup>+</sup> 137.1073; Found 137.1159.

Viscosity ( $\eta$ ) (~30 °C): 16.9 cP.

**Conductivity** ( $\sigma_c$ ) (~30 °C): 0.618 (mS.cm<sup>-1</sup>).

**1-Pentenyl-3-methylimidazolium tetrafluoromethanesulfonate [PentMIm](OTf)**

**<sup>1</sup>H NMR** (500 MHz, CDCl<sub>3</sub>)  $\delta$  9.88 (s, 1H), 7.34 (s, 1H), 7.44 (s, 1H), 5.70 – 5.62 (m, 2H), 4.96 – 4.89 (q,  $J = 17.0$  Hz, 8.0 Hz, 2H), 4.23 – 4.20 (t,  $J = 2.0$  Hz, 1H), 3.98 (s, 3H), 1.95 – 1.92 (m, 4H).

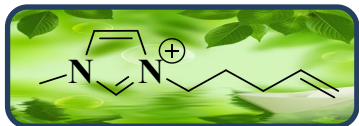

**<sup>13</sup>C-NMR** (125 MHz, CDCl<sub>3</sub>)  $\delta$  136.9, 136.0, 123.8, 122.2, 116.3, 49.3, 36.6, 30.0, 29.1.

**HRMS (ESI)**  $m/z$  Calcd for [M]<sup>+</sup> 151.1230 ; Found 151.1221.

**Viscosity** ( $\eta$ ) (~30 °C): 94.4 cP.

**Conductivity** ( $\sigma_c$ ) (~30 °C): 12.910 (mS.cm<sup>-1</sup>).

# $^1\text{H}$ NMR, $^{13}\text{C}$ NMR, HRMS, viscosity of [AMIm]OTf

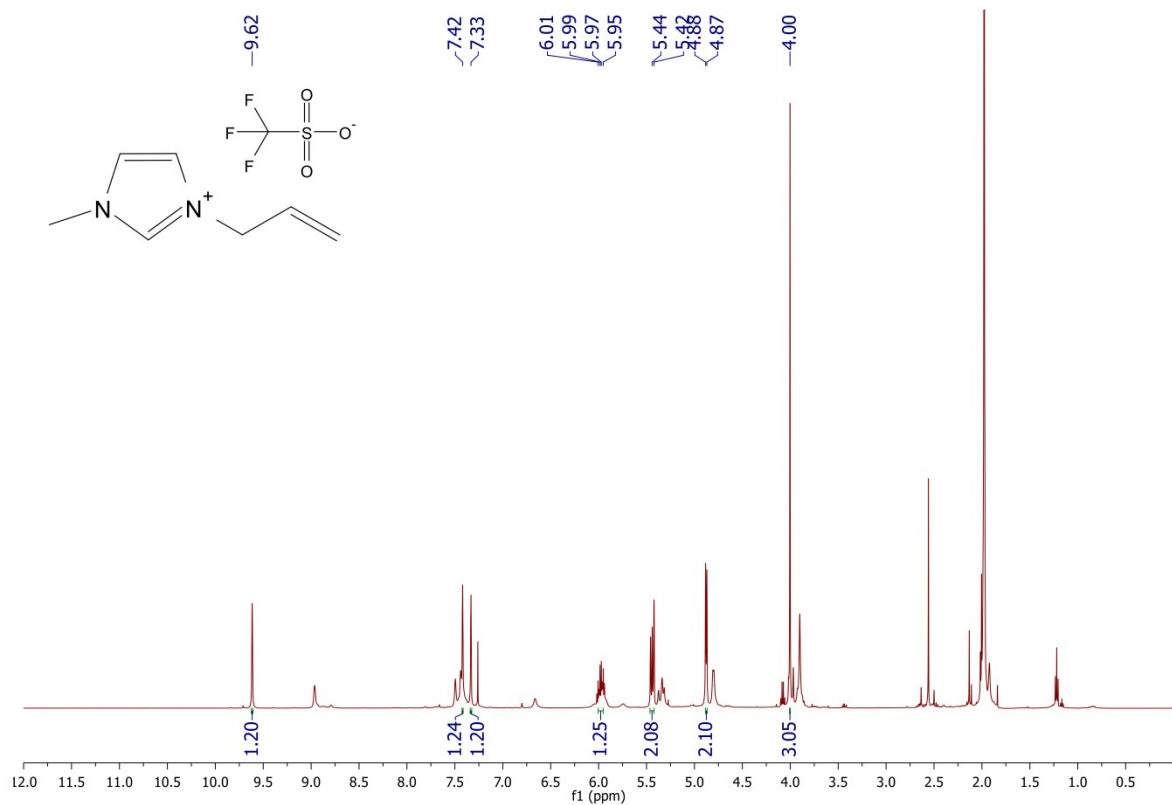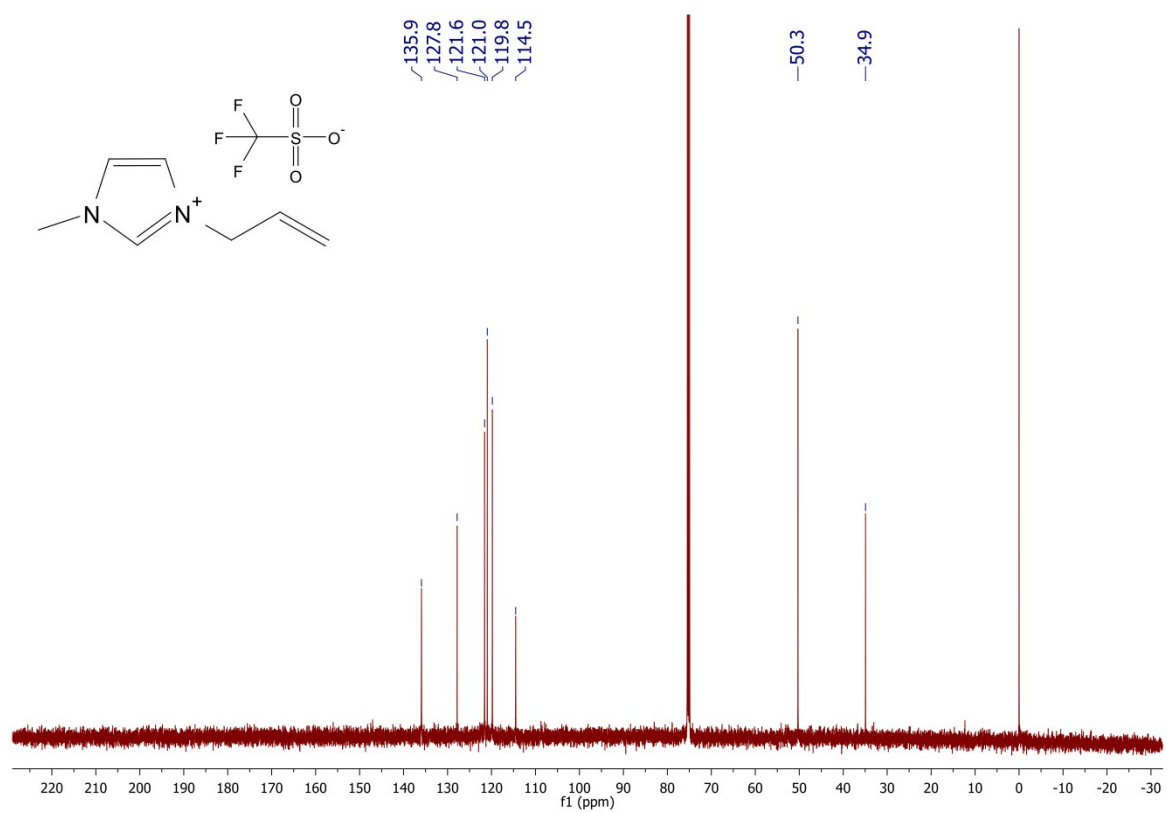

## Display Report

### Analysis Info

Analysis Name D:\Data\dmm 2015\AMIM\_1-F,2\_01\_16187.d  
Method dmm.m  
Sample Name AMIM  
Comment

Acquisition Date 5/25/2015 9:39:53 PM

Operator Mai  
Instrument micrOTOF-Q 10187

### Acquisition Parameter

|             |            |                       |           |                  |           |
|-------------|------------|-----------------------|-----------|------------------|-----------|
| Source Type | ESI        | Ion Polarity          | Positive  | Set Nebulizer    | 2.0 Bar   |
| Focus       | Not active | Set Capillary         | 4500 V    | Set Dry Heater   | 200 °C    |
| Scan Begin  | 100 m/z    | Set End Plate Offset  | -500 V    | Set Dry Gas      | 9.0 l/min |
| Scan End    | 3000 m/z   | Set Collision Cell RF | 250.0 Vpp | Set Divert Valve | Source    |

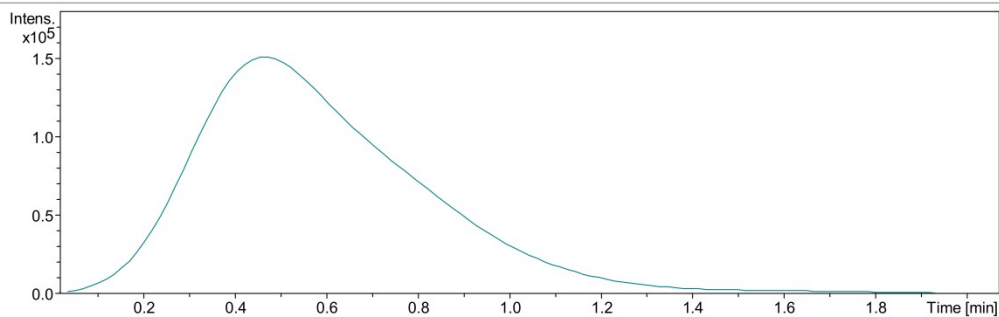

— EIC 123.0000±0.3000 +All MS, -Spectral Bkgrnd, Smoothed (1.01,50,GA)

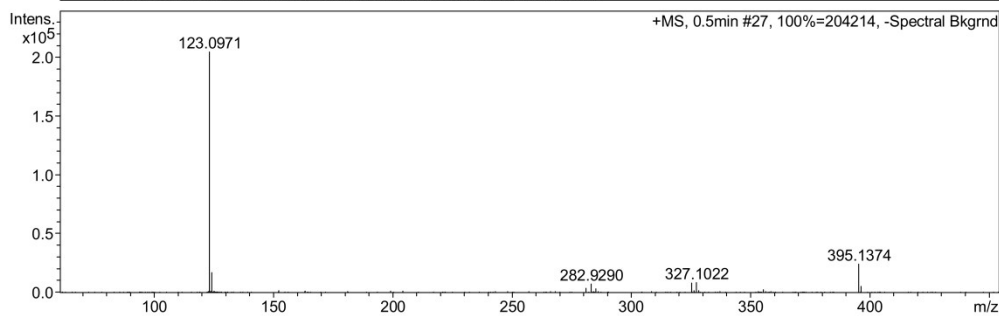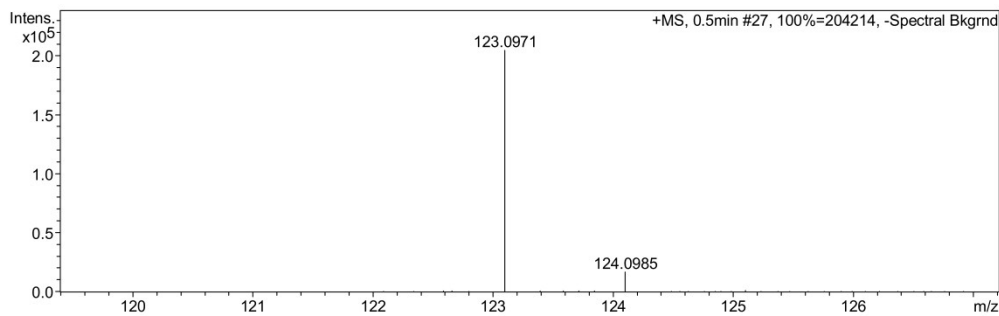

| Rheocalc V2.7                                                                                                                                                  |                |             |              | Brookfield Engineering Labs       |                    |                  |                         |
|----------------------------------------------------------------------------------------------------------------------------------------------------------------|----------------|-------------|--------------|-----------------------------------|--------------------|------------------|-------------------------|
| <b>Math Model: Bingham</b><br><b>Plastic Viscosity: 33,7 cP</b> <b>Yield Stress: -2,51 D/cm<sup>2</sup></b><br><b>Confidence of Fit: 95,0 %</b>                |                |             |              |                                   |                    |                  |                         |
| <b>File:</b> F:\24-6-15\AMIM.DB<br><b>Test Date:</b> 25/06/2015 <b>Test Time:</b> 7:48:16 SA <b>Model:</b> RV <b>Spindle:</b> CP40<br><b>Sample Name:</b> AMim |                |             |              |                                   |                    |                  |                         |
| #                                                                                                                                                              | Viscosity (cP) | Speed (RPM) | % Torque (%) | Shear Stress (D/cm <sup>2</sup> ) | Shear Rate (1/sec) | Temperature (°C) | Time Interval (mm:ss.t) |
| 1                                                                                                                                                              | 34,01          | 5,00        | 5,2          | 12,75                             | 37,50              | 30,1             | 00:30,                  |
| 2                                                                                                                                                              | 35,97          | 10,00       | 11,0         | 26,98                             | 75,00              | 30,0             | 00:30,                  |
| 3                                                                                                                                                              | 30,96          | 15,00       | 14,2         | 34,83                             | 112,50             | 30,0             | 00:30,                  |
| 4                                                                                                                                                              | 30,41          | 20,00       | 18,6         | 45,62                             | 150,00             | 30,0             | 00:30,                  |
| 5                                                                                                                                                              | 30,61          | 25,00       | 23,4         | 57,39                             | 187,50             | 30,2             | 00:30,                  |
| 6                                                                                                                                                              | 31,39          | 30,00       | 28,8         | 70,63                             | 225,00             | 30,1             | 00:30,                  |
| 7                                                                                                                                                              | 32,05          | 35,00       | 34,3         | 84,12                             | 262,50             | 30,0             | 00:30,                  |
| 8                                                                                                                                                              | 32,78          | 40,00       | 40,1         | 98,35                             | 300,00             | 30,1             | 00:30,                  |
| 9                                                                                                                                                              | 33,06          | 45,00       | 45,5         | 111,59                            | 337,50             | 30,2             | 00:30,                  |
| 10                                                                                                                                                             | 33,68          | 50,00       | 51,5         | 126,30                            | 375,00             | 30,2             | 00:30,                  |
| 11                                                                                                                                                             | 33,53          | 55,00       | 56,4         | 138,32                            | 412,50             | 30,0             | 00:30,                  |
| 12                                                                                                                                                             | 33,35          | 60,00       | 61,2         | 150,09                            | 450,00             | 30,2             | 00:30,                  |

Notes:



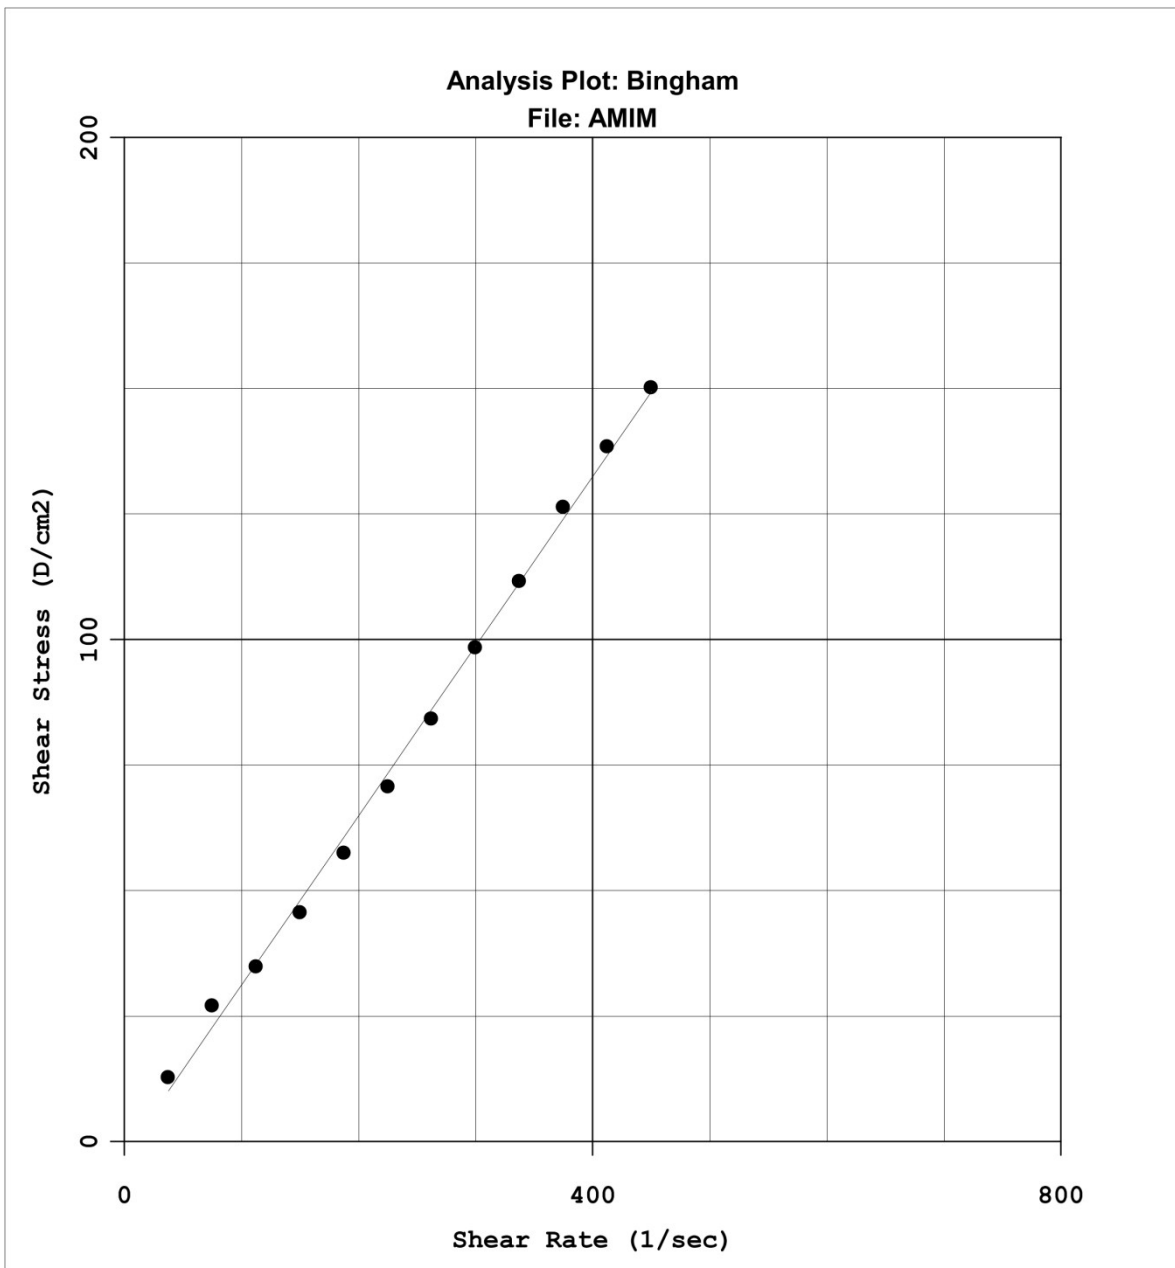

Plastic Viscosity = 33.7

Yield Stress = -2.51

CoF = 95.0

**$^1\text{H}$  &  $^{13}\text{C}$  NMR, HR-MS, viscosity of [ButMim](OTf)**

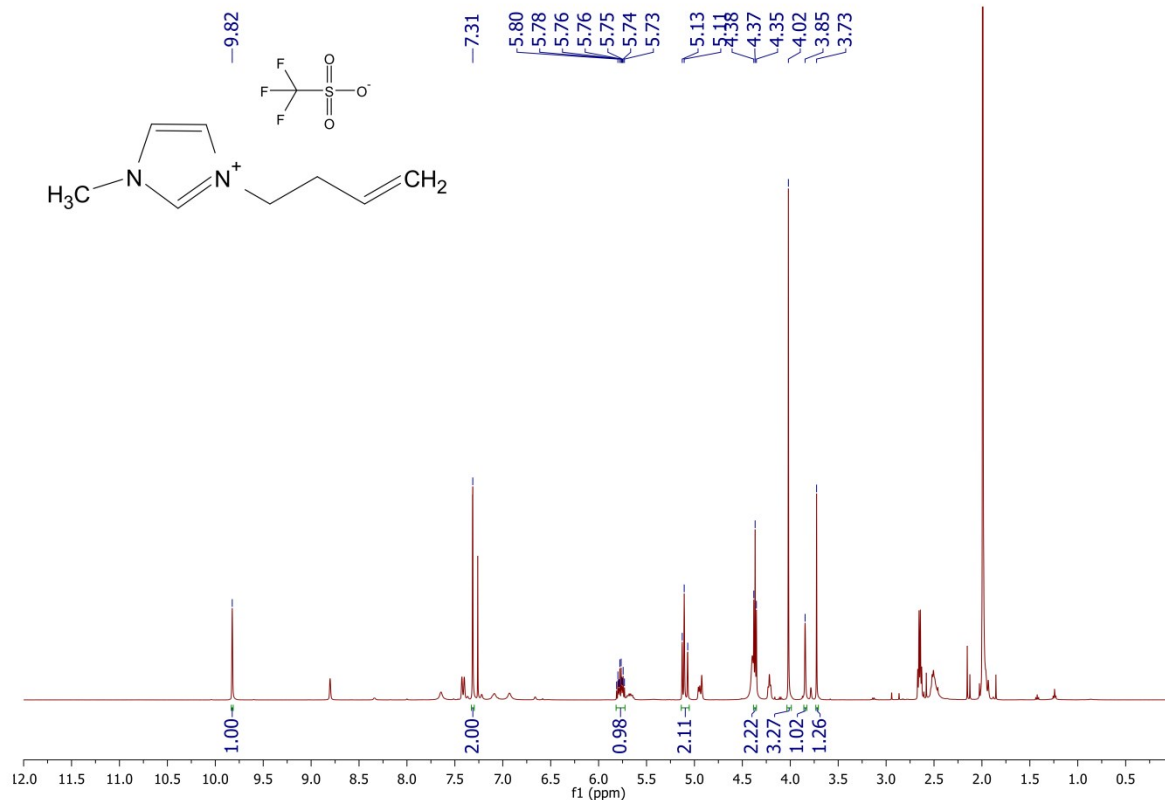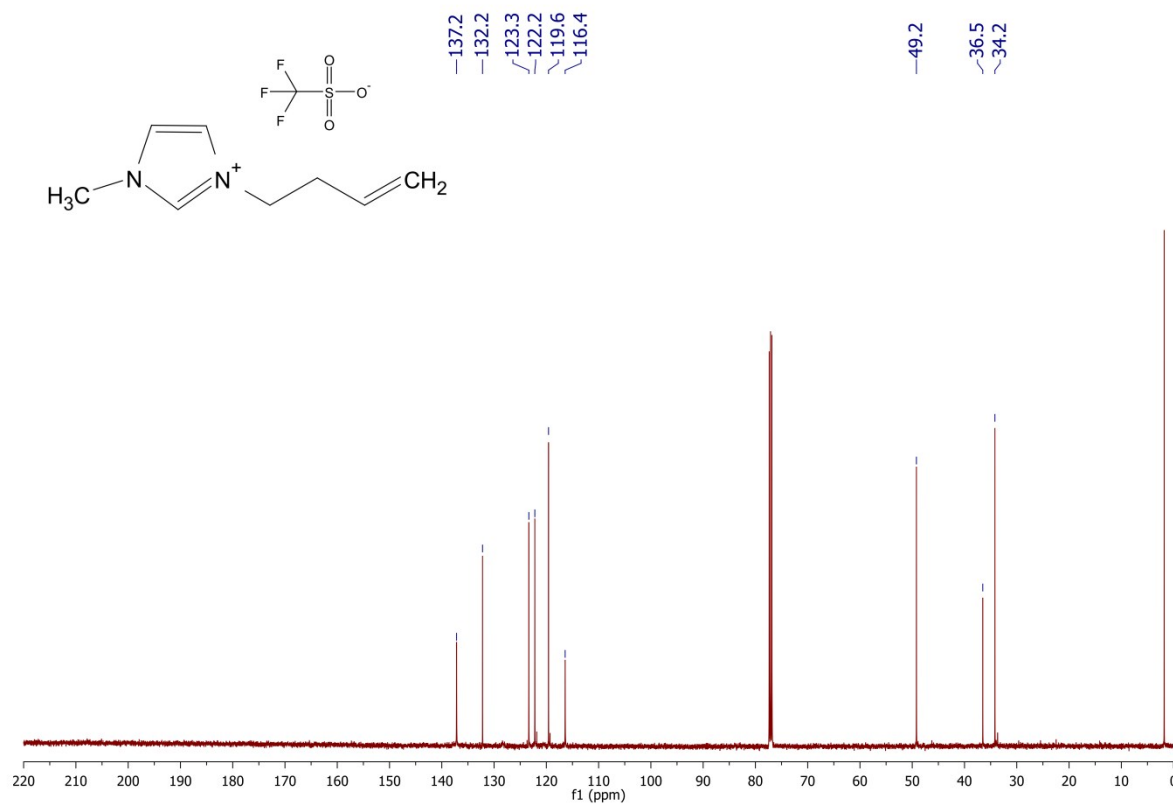

## Display Report

### Analysis Info

Analysis Name D:\Data\dmm 2015\butmim\_1-d,1\_01\_15940.d  
Method dmm.m  
Sample Name butmim  
Comment

Acquisition Date 5/11/2015 11:50:26 AM

Operator Mai  
Instrument micrOTOF-Q 10187

### Acquisition Parameter

|             |            |                       |           |                  |           |
|-------------|------------|-----------------------|-----------|------------------|-----------|
| Source Type | ESI        | Ion Polarity          | Positive  | Set Nebulizer    | 1.2 Bar   |
| Focus       | Not active | Set Capillary         | 4500 V    | Set Dry Heater   | 200 °C    |
| Scan Begin  | 50 m/z     | Set End Plate Offset  | -500 V    | Set Dry Gas      | 9.0 l/min |
| Scan End    | 500 m/z    | Set Collision Cell RF | 200.0 Vpp | Set Divert Valve | Source    |

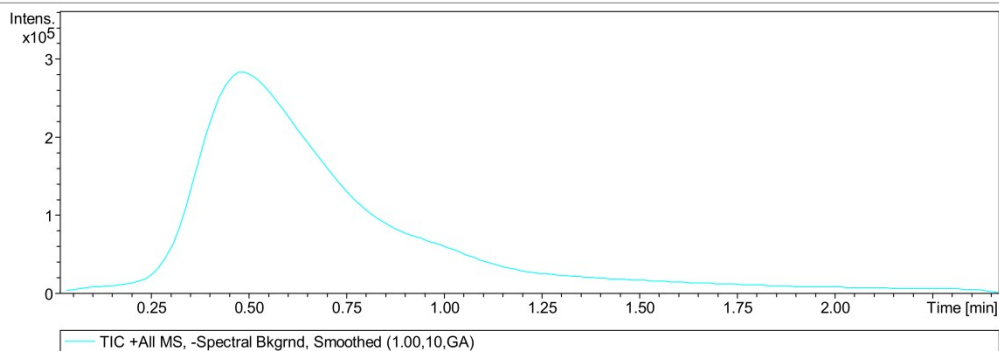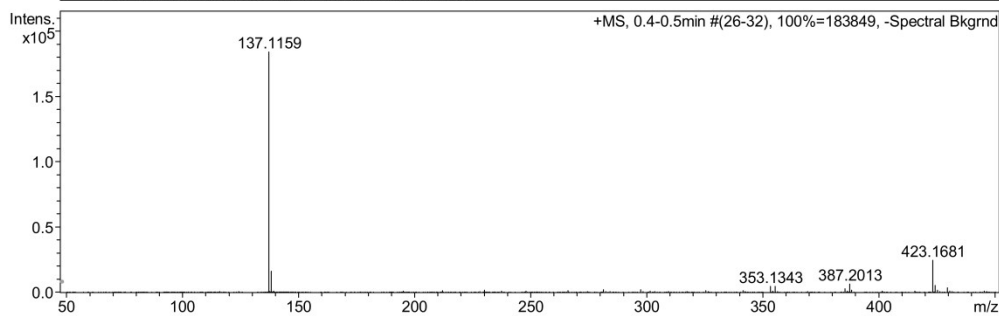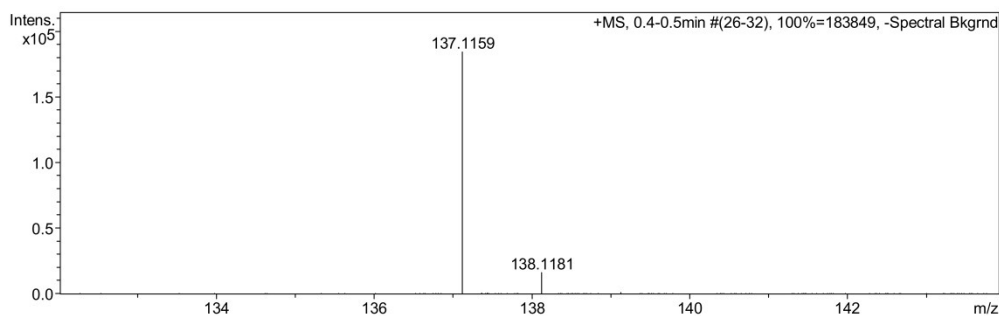

| Rheocalc V2.7                                                                                                                                                      |                |             |              | Brookfield Engineering Labs       |                    |                  |                         |
|--------------------------------------------------------------------------------------------------------------------------------------------------------------------|----------------|-------------|--------------|-----------------------------------|--------------------|------------------|-------------------------|
| <b>Math Model: Bingham</b><br><b>Plastic Viscosity: 16,9 cP</b> <b>Yield Stress: 0,55 D/cm<sup>2</sup></b><br><b>Confidence of Fit: 96,3 %</b>                     |                |             |              |                                   |                    |                  |                         |
| <b>File:</b> F:\24-6-15\BUTMIM.DB<br><b>Test Date:</b> 25/06/2015 <b>Test Time:</b> 7:27:30 SA <b>Model:</b> RV <b>Spindle:</b> CP40<br><b>Sample Name:</b> ButMim |                |             |              |                                   |                    |                  |                         |
| #                                                                                                                                                                  | Viscosity (cP) | Speed (RPM) | % Torque (%) | Shear Stress (D/cm <sup>2</sup> ) | Shear Rate (1/sec) | Temperature (°C) | Time Interval (mm:ss.t) |
| 1                                                                                                                                                                  | 15,04          | 5,00        | 2,3          | 5,64                              | 37,50              | 29,7             | 00:30,                  |
| 2                                                                                                                                                                  | 19,29          | 10,00       | 5,9          | 14,47                             | 75,00              | 29,8             | 00:30,                  |
| 3                                                                                                                                                                  | 16,79          | 15,00       | 7,7          | 18,88                             | 112,50             | 29,8             | 00:30,                  |
| 4                                                                                                                                                                  | 16,02          | 20,00       | 9,8          | 24,03                             | 150,00             | 29,7             | 00:30,                  |
| 5                                                                                                                                                                  | 17,13          | 25,00       | 13,1         | 32,13                             | 187,50             | 29,8             | 00:30,                  |
| 6                                                                                                                                                                  | 17,66          | 30,00       | 16,2         | 39,73                             | 225,00             | 29,9             | 00:30,                  |
| 7                                                                                                                                                                  | 17,56          | 35,00       | 18,8         | 46,11                             | 262,50             | 30,0             | 00:30,                  |
| 8                                                                                                                                                                  | 17,58          | 40,00       | 21,5         | 52,73                             | 300,00             | 30,0             | 00:30,                  |
| 9                                                                                                                                                                  | 17,44          | 45,00       | 24,0         | 58,86                             | 337,50             | 30,0             | 00:30,                  |
| 10                                                                                                                                                                 | 17,07          | 50,00       | 26,1         | 64,01                             | 375,00             | 30,0             | 00:30,                  |
| 11                                                                                                                                                                 | 17,06          | 55,00       | 28,7         | 70,39                             | 412,50             | 30,0             | 00:30,                  |
| 12                                                                                                                                                                 | 17,00          | 60,00       | 31,2         | 76,52                             | 450,00             | 30,0             | 00:30,                  |
| 13                                                                                                                                                                 | 17,00          | 65,00       | 33,8         | 82,89                             | 487,50             | 30,0             | 00:30,                  |
| 14                                                                                                                                                                 | 17,00          | 70,00       | 36,4         | 89,27                             | 525,00             | 30,0             | 00:30,                  |
| 15                                                                                                                                                                 | 16,83          | 75,00       | 38,6         | 94,67                             | 562,50             | 30,0             | 00:30,                  |

Notes:

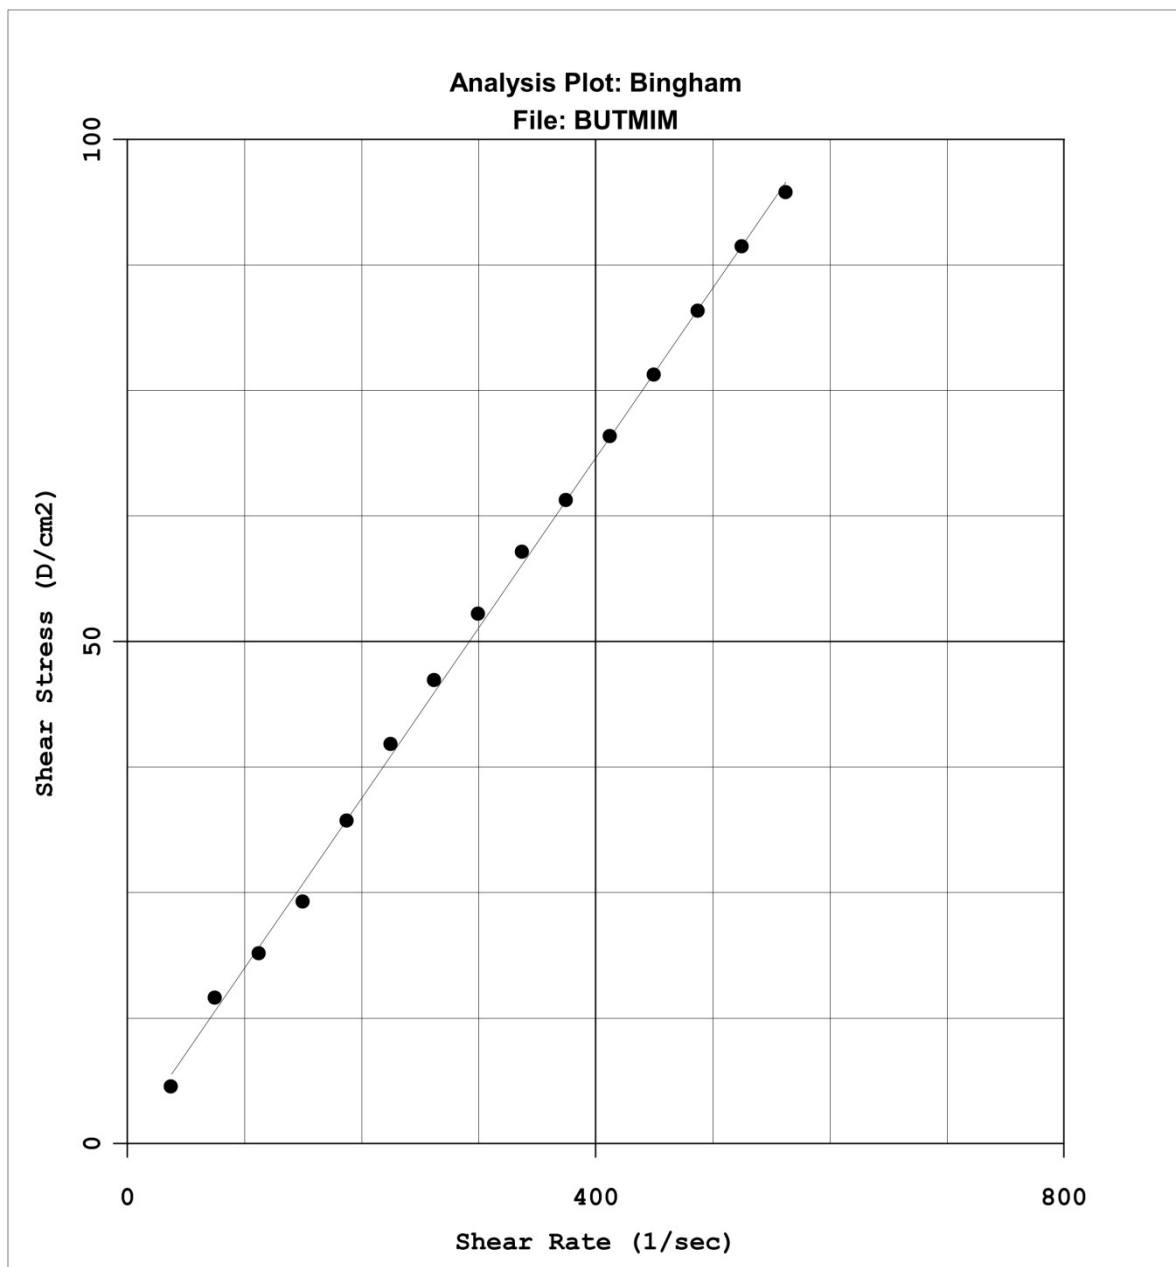

Plastic Viscosity = 16,9

Yield Stress = 0,55

CoF = 96,3

# $^1\text{H}$ & $^{13}\text{C}$ NMR, HR-MS, viscosity of [PentMIm]OTf

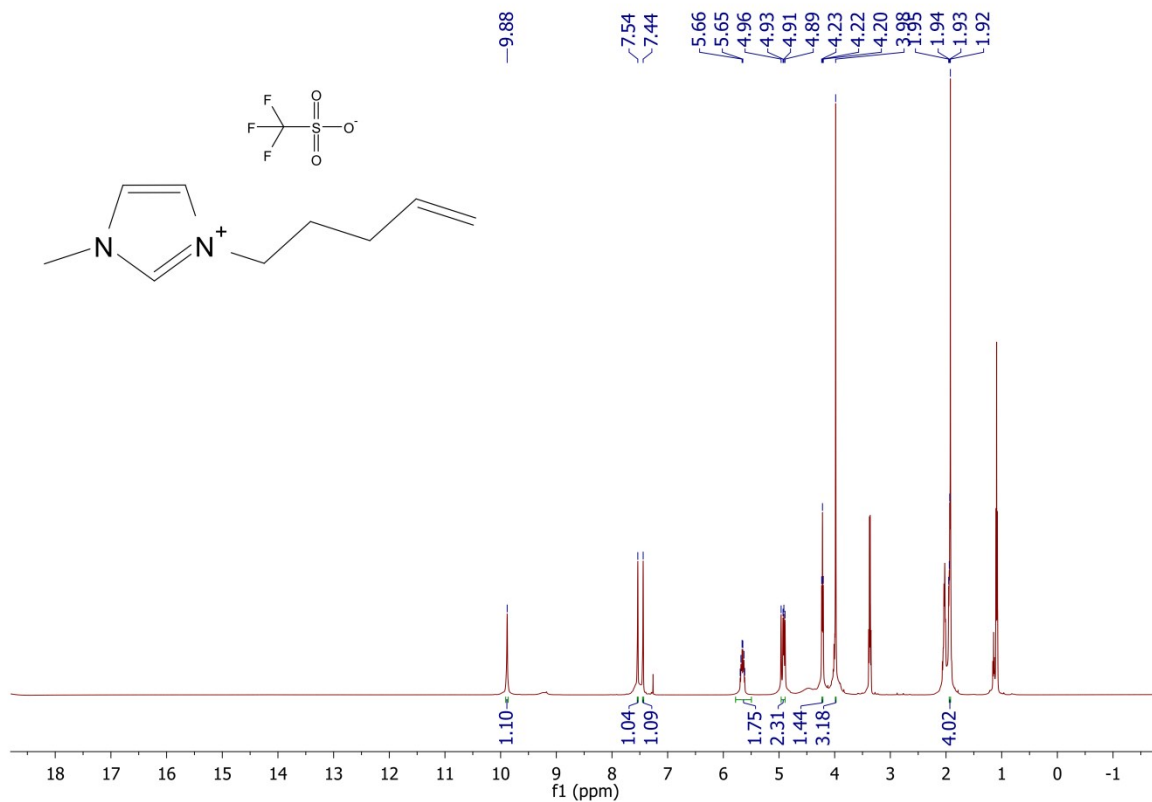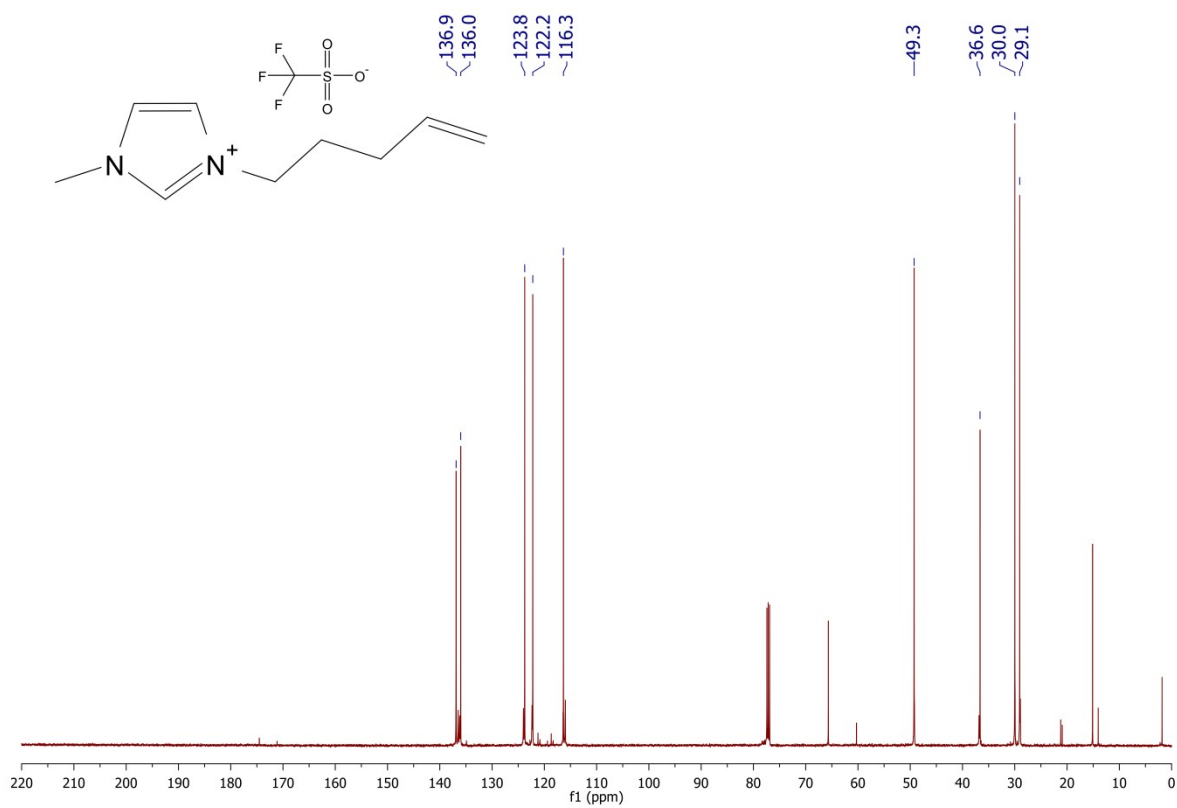

## Display Report

### Analysis Info

Analysis Name D:\Data\dmm 2015\pent mim\_1-c,1\_01\_14978.d  
Method protein my mass tb.m  
Sample Name pent mim  
Comment

Acquisition Date 3/20/2015 5:35:29 PM

Operator Mai  
Instrument micrOTOF-Q 10187

### Acquisition Parameter

|             |            |                       |           |                  |           |
|-------------|------------|-----------------------|-----------|------------------|-----------|
| Source Type | ESI        | Ion Polarity          | Positive  | Set Nebulizer    | 1.2 Bar   |
| Focus       | Not active | Set Capillary         | 4500 V    | Set Dry Heater   | 200 °C    |
| Scan Begin  | 50 m/z     | Set End Plate Offset  | -500 V    | Set Dry Gas      | 8.0 l/min |
| Scan End    | 3000 m/z   | Set Collision Cell RF | 120.0 Vpp | Set Divert Valve | Source    |

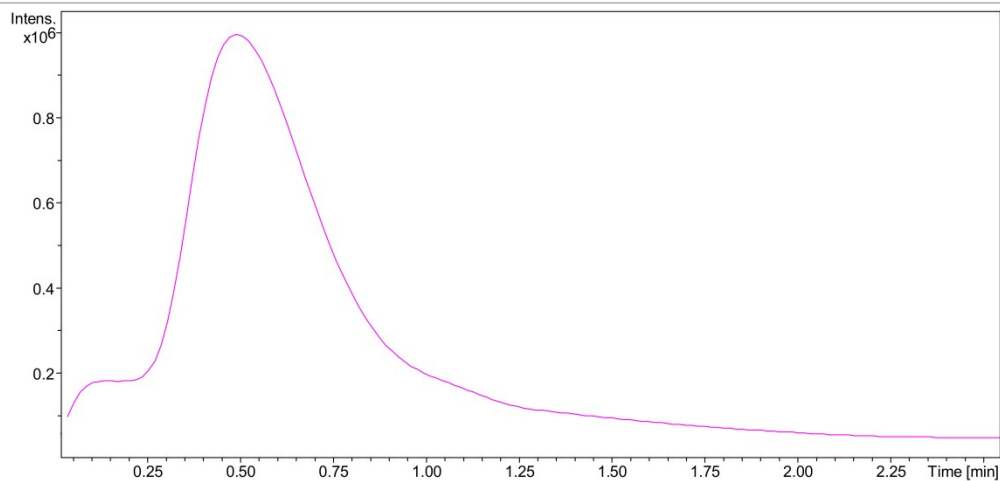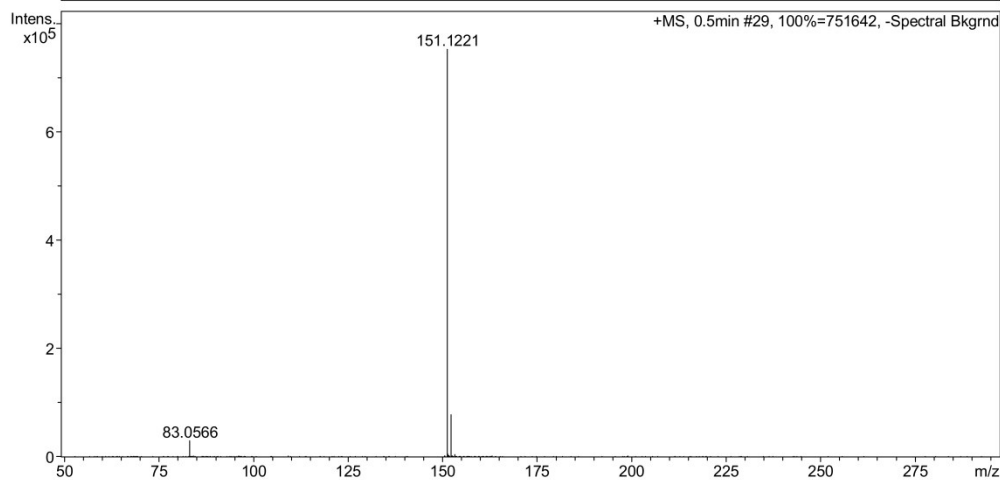

**Rheocalc V2.7** **Brookfield Engineering Labs**

Math Model: Bingham  
 Plastic Viscosity: 94.4 cP Yield Stress: 1.10 D/cm<sup>2</sup>  
Confidence of Fit: 98.2 %

File: D:\Do do nhot\Truong Hai (KHTN)\Penmim.DB

Test Date: 3/12/2015 Test Time: 2:04:06 PM Model: RV Spindle: CP40

Sample Name: Penmim

| # | Viscosity (cP) | Speed (RPM) | % Torque (%) | Shear Stress (D/cm <sup>2</sup> ) | Shear Rate (1/sec) | Temperature (°C) | Time Interval (mm:ss.t) |
|---|----------------|-------------|--------------|-----------------------------------|--------------------|------------------|-------------------------|
| 1 | 92.21          | 5.00        | 14.1         | 34.58                             | 37.50              | 31.3             | 00:30.2                 |
| 2 | 96.47          | 10.00       | 29.5         | 72.35                             | 75.00              | 31.3             | 00:30.2                 |
| 3 | 97.45          | 15.00       | 44.7         | 109.63                            | 112.50             | 31.2             | 00:30.2                 |
| 4 | 94.83          | 20.00       | 58.0         | 142.25                            | 150.00             | 31.1             | 00:30.2                 |
| 5 | 95.88          | 25.00       | 73.3         | 179.77                            | 187.50             | 31.1             | 00:30.2                 |
| 6 | 93.96          | 30.00       | 86.2         | 211.41                            | 225.00             | 31.1             | 00:30.2                 |

Notes:



Analysis Plot: Bingham

File: Penmim

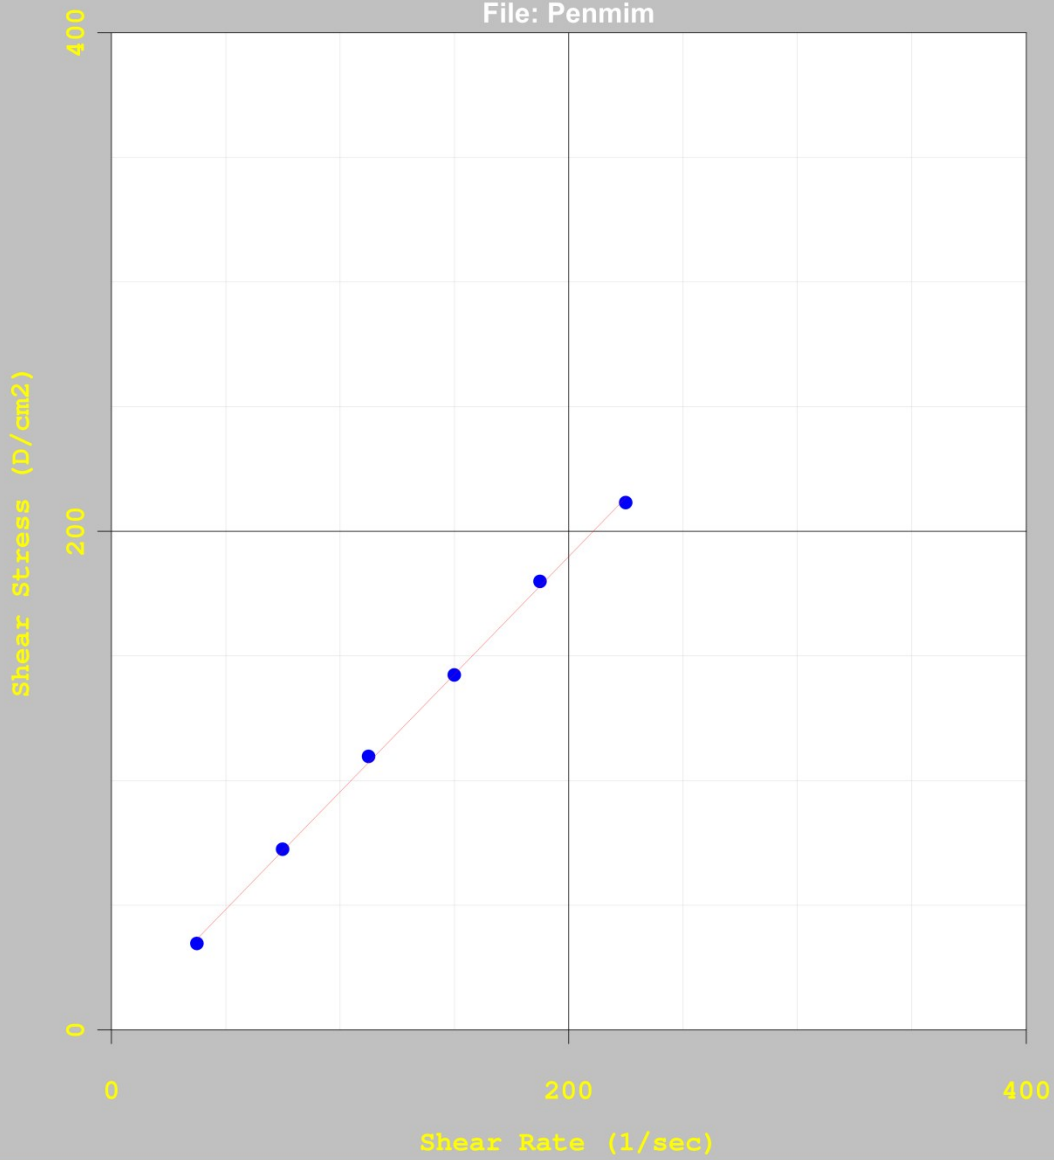

Plastic Viscosity = 94.4

Yield Stress = 1.10

CoF = 98.2

## References

1. N. Papageorgiou, *J. Electrochem. Soc.*, 1996, **143**, 3099-3108.
2. H. Matsumoto, T. Matsuda, T. Tsuda, R. Hagiwara, Y. Ito and Y. Miyazaki, *Chem. Lett.*, 2001, **30**, 26-27.
3. P. Wang, S. M. Zakeeruddin, J.-E. Moser and M. Grätzel, *J. Physic. Chem. B*, 2003, **107**, 13280-13285.
4. P. Wang, S. M. Zakeeruddin, R. Humphry-Baker and M. Grätzel, *Chem. Mater.*, 2004, **16**, 2694-2696.
5. R. Kawano, H. Matsui, C. Matsuyama, A. Sato, M. A. B. H. Susan, N. Tanabe and M. Watanabe, *J. Photochem. Photobiol. A: Chem.*, 2004, **164**, 87-92.
6. P. Wang, B. Wenger, R. Humphry-Baker, J.-E. Moser, J. Teuscher, W. Kantelehner, J. Mezger, E. V. Stoyanov, S. M. Zakeeruddin and M. Grätzel, *J. Am. Chem. Soc.*, 2005, **127**, 6850-6856.
7. D. Kuang, P. Wang, S. Ito, S. M. Zakeeruddin and M. Grätzel, *J. Am. Chem. Soc.*, 2006, **128**, 7732-7733.
8. D. Kuang, C. Klein, Z. Zhang, S. Ito, J. E. Moser, S. M. Zakeeruddin and M. Gratzel, *Small*, 2007, **3**, 2094-2102.
9. M. Gorlov, H. Pettersson, A. Hagfeldt and L. Kloo, *Inorg. Chem.*, 2007, **46**, 3566-3575.
10. Y. Wang, Y. Sun, B. Song and J. Xi, *Sol. Energy Mater. Sol. Cells*, 2008, **92**, 660-666.
11. H. Gamstedt, A. Hagfeldt and L. Kloo, *Polyhedron*, 2009, **28**, 757-762.
12. P. Cheng, W. Wang, T. Lan, R. Chen, J. Wang, J. Yu, H. Wu, H. Yang, C. Deng and S. Guo, *J. Photochem. Photobiol. A: Chem.*, 2010, **212**, 147-152.
13. L. Guo, X. Pan, M. Wang, C. Zhang, X. Fang, S. Chen and S. Dai, *Solar Energy*, 2011, **85**, 7-11.
14. A. Abate, A. Petrozza, V. Rofati, S. Guarnera, H. Snaith, F. Matteucci, G. Lanzani, P. Metrangolo and G. Resnati, *Organic Electronics*, 2012, **13**, 2474-2478.
15. H. Wu, Z. Lv, S. Hou, X. Cai, D. Wang, H. Kafafy, Y. Fu, C. Zhang, Z. Chu and D. Zou, *J. Power Sources*, 2013, **221**, 328-333.
16. S. M. M. Yusof and W. Z. N. Yahya, *Procedia Engineering*, 2016, **148**, 100-105.
17. S. Denizalti, A. K. Ali, Ç. Ela, M. Ekmekci and S. Erten-Ela, *Chem. Phys. Lett.*, 2018, **691**, 373-378.
